# Supplementary material
Source: ML conference proceedings conference paper supplement (https://proceedings.neurips.cc/paper_files/paper/2019/hash/812b4ba287f5ee0bc9d43bbf5bbe87fb-Abstract.html)
Supplement: Supplementary file [file 812b4ba287f5ee0bc9d43bbf5bbe87fb-Supplemental.zip]

---

# Supplementary Materials:

## You Only Propagate Once: Accelerating Adversarial Training via Maximal Principle

---

### A Proof Of The Theorems

#### A.1 Proof of Theorem 1

In this section we give the full statement of the maximum principle for the adversarial training and present a proof. Let's start from the case of the natural training of neural networks.

**Theorem.** (*PMP for adversarial training*) Assume  $\ell_i$  is twice continuous differentiable,  $f_t(\cdot, \theta), R_t(\cdot, \theta)$  are twice continuously differentiable with respect to  $x$ , and  $f_t(\cdot, \theta), R_t(\cdot, \theta)$  together with their  $x$  partial derivatives are uniformly bounded in  $t$  and  $\theta$ . The sets  $\{f_t(x, \theta) : \theta \in \Theta_t\}$  and  $\{R_t(x, \theta) : \theta \in \Theta_t\}$  are convex for every  $t$  and  $x \in \mathbb{R}^{d_t}$ . Let  $\theta^*$  to be the solution of

$$\min_{\theta \in \Theta} \max_{\|\eta\|_\infty \leq \epsilon} J(\theta, \eta) := \frac{1}{N} \sum_{i=1}^N \ell_i(x_{i,T}) + \frac{1}{N} \sum_{i=1}^N \sum_{t=0}^{T-1} R_t(x_{i,t}, \theta_t) \quad (1)$$

$$\text{subject to } x_{i,1} = f_0(x_{i,0} + \eta_i; \theta_0), i = 1, 2, \dots, N \quad (2)$$

$$x_{i,t+1} = f_t(x_{i,t}, \theta_t), t = 1, 2, \dots, T-1. \quad (3)$$

Then there exists co-state processes  $p_i^* := p_{i,t}^* : t = 0, \dots, T$  such that the following holds for all  $t \in [T]$  and  $i \in [N]$ :

$$x_{i,t+1}^* = \nabla_p H_t(x_{i,t}^*, p_{i,t+1}^*, \theta_t^*), \quad x_{i,0}^* = x_{i,0} + \eta_i^* \quad (4)$$

$$p_{i,t}^* = \nabla_x H_t(x_{i,t}^*, p_{i,t+1}^*, \theta_t^*), \quad p_{i,T}^* = -\frac{1}{N} \nabla \ell_i(x_{i,T}^*) \quad (5)$$

Here  $H$  is the per-layer defined Hamiltonian function  $H_t : \mathbb{R}^{d_t} \times \mathbb{R}^{d_{t+1}} \times \Theta_t \rightarrow \mathbb{R}$  as

$$H_t(x, p, \theta_t) = p \cdot f_t(x, \theta_t) - \frac{1}{N} R_t(x, \theta_t)$$

At the same time, the parameter of the first layer  $\theta_0^* \in \Theta_0$  and the best perturbation  $\eta^*$  satisfy

$$\sum_{i=1}^N H_0(x_{i,0}^* + \eta_i, p_{i,1}^*, \theta_0^*) \geq \sum_{i=1}^N H_0(x_{i,0}^* + \eta_i^*, p_{i,1}^*, \theta_0^*) \geq \sum_{i=1}^N H_0(x_{i,0}^* + \eta_i^*, p_{i,1}^*, \theta_0), \forall \theta_0 \in \Theta_0, \|\eta_i\|_\infty \leq \epsilon \quad (6)$$

while parameter of the other layers  $\theta_t^* \in \Theta_t, t = 1, 2, \dots, T-1$  will maximize the Hamiltonian functions

$$\sum_{i=1}^N H_t(x_{i,t}^*, p_{i,t+1}^*, \theta_t^*) \geq \sum_{i=1}^N H_t(x_{i,t}^*, p_{i,t+1}^*, \theta_t), \forall \theta_t \in \Theta_t \quad (7)$$

*Proof.* We first propose PMP for discrete time dynamic system and utilize it directly gives out the proof of PMP for adversarial training.

**Lemma 1.** (PMP for discrete time dynamic system) Assume  $\ell$  is twice continuous differentiable,  $f_t(\cdot, \theta)$ ,  $R_t(\cdot, \theta)$  are twice continuously differentiable with respect to  $x$ , and  $f_t(\cdot, \theta)$ ,  $R_t(\cdot, \theta)$  together with their  $x$  partial derivatives are uniformly bounded in  $t$  and  $\theta$ . The sets  $\{f_t(x, \theta) : \theta \in \Theta_t\}$  and  $\{R_t(x, \theta) : \theta \in \Theta_t\}$  are convex for every  $t$  and  $x \in \mathbb{R}^{d_t}$ . Let  $\theta^*$  to be the solution of

$$\min_{\theta \in \Theta} \max_{\|\eta\|_\infty \leq \epsilon} J(\theta, \eta) := \frac{1}{N} \sum_{i=1}^N \ell_i(x_{i,T}) + \frac{1}{N} \sum_{i=1}^N \sum_{t=0}^{T-1} R_t(x_{i,t}, \theta_t) \quad (8)$$

$$\text{subject to } x_{i,t+1} = f_t(x_{i,t}, \theta_t), i \in [N], t = 0, 1, \dots, T-1. \quad (9)$$

There exists co-state processes  $p_i^* := p_{i,t}^* : t = 0, \dots, T$  such that the following holds for all  $t \in [T]$  and  $i \in [N]$ :

$$x_{i,t+1}^* = \nabla_p H_t(x_{i,t}^*, p_{i,t+1}^*, \theta_t^*), \quad x_{i,0}^* = x_{i,0} \quad (10)$$

$$p_{i,t}^* = \nabla_x H_t(x_{i,t}^*, p_{i,t+1}^*, \theta_t^*), \quad p_{i,T}^* = -\frac{1}{N} \nabla \ell_i(x_{i,T}^*) \quad (11)$$

Here  $H$  is the per-layer defined Hamiltonian function  $H_t : \mathbb{R}^{d_t} \times \mathbb{R}^{d_{t+1}} \times \Theta_t \rightarrow \mathbb{R}$  as

$$H_t(x, p, \theta_t) = p \cdot f_t(x, \theta_t) - \frac{1}{N} R_t(x, \theta_t)$$

The parameters of the layers  $\theta_t^* \in \Theta_t, t = 0, 1, \dots, T-1$  will maximize the Hamiltonian functions

$$\sum_{i=1}^N H_t(x_{i,t}^*, p_{i,t+1}^*, \theta_t^*) \geq \sum_{i=1}^N H_t(x_{i,t}^*, p_{i,t+1}^*, \theta_t), \forall \theta_t \in \Theta_t \quad (12)$$

*Proof.* Without loss of generality, we let  $L = 0$ . The reason is that we can simply add an extra dynamic  $w_t$  to calculate the regularization term  $R$ , i.e.

$$w_{t+1} = w_t + R_t(x_t, \theta_t), w_0 = 0.$$

We append  $w$  to  $x$  to study the dynamic of a new  $d_t + 1$  dimension vector and modify  $f_t(x, \theta)$  to  $(f_t(x, \theta), w + R_t(x, \theta))$ . Thus we only need to prove the case when  $L = 0$ .

For simplicity, we omit the subscript  $s$  in the following proof. (Concatenating all  $x_s$  into  $x = (x_1, \dots, x_N)$  can justify this.)

Now we begin the proof. Following the linearization lemma in [?] [19], consider the linearized problem

$$\phi_{t+1} = f_t(x_t^*, \theta_t) + \nabla_x f_t(x_t^*, \theta_t)(\phi_t - x_t^*), \phi_0 = x_0 + \eta. \quad (13)$$

The reachable states by the linearized dynamic system is denoted as

$$W_t := \{x \in \mathbb{R}^{d_t} : \exists \theta, \eta = \eta^* \text{ s.t. } \phi_t^\theta = x\}$$

here  $x_t^\theta$  denotes the the evolution of the dynamical system for  $x_t$  under  $\theta$ . We also define

$$S := \{x \in \mathbb{R}^{d_T} : (x - x_T^*) \nabla \ell(x_T^*) < 0\}$$

The linearization lemma in [?] [19] tells us that  $W_T$  and  $S$  are separated by  $\{x : p_T^* \cdot (x - x_T^*) = 0, p_T^* = -\nabla \ell(x_T^*)\}$ , i.e.

$$p_T^* \cdot (x - x_T^*) \leq 0, \forall x \in W_t. \quad (14)$$

Thus setting

$$p_t^* = \nabla_x H_t(x_t^*, p_{t+1}^*, \theta_t^*) = \nabla_x f_t(x_t^*, \theta_t^*)^T \cdot p_{t+1}^*,$$

we have

$$(\phi_{t+1} - x_{t+1}^*) \cdot p_t^* = (\phi_t - x_t^*) \cdot p_t^*. \quad (15)$$

Thus from Eq.14 and Eq.15 we get

$$p_{t+1}^* \cdot (\phi_{t+1}^\theta - x_{t+1}^*) \leq 0, \quad t = 0, \dots, T-1, \forall \theta \in \Theta := \Theta_0 \times \Theta_1 \times \dots$$

Setting  $\theta_s = \theta_s^*$  for  $s < t$  we have  $\phi_{t+1}^\theta = f_t(x_t^*, \theta_t)$ , which leads to  $p_{t+1}^* \cdot (f_t(x_t^*, \theta_t) - x_{t+1}^*) \leq 0$ . This finishes the proof of the maximal principle on weight space  $\Theta$ .  $\square$

We return to the proof of the theorem. The proof of the maximal principle on the weight space, *i.e.*

$$\sum_{i=1}^N H_t(x_{i,t}^*, p_{i,t+1}^*, \theta_t^*) \geq \sum_{i=1}^N H_t(x_{i,t}^*, p_{i,t+1}^*, \theta), \forall \theta_t \in \Theta_t, t = 1, 2, \dots, T-1$$

and

$$\sum_{i=1}^N H_0(x_{i,0}^* + \eta_i^*, p_{i,1}^*, \theta_0^*) \geq \sum_{i=1}^N H_0(x_{i,0}^* + \eta_i^*, p_{i,1}^*, \theta_0), \forall \theta_0 \in \Theta_0,$$

can be reached with the help of Lemma 1: replacing the dynamic start point  $x_{i,0}$  in Eq.10 with  $x_{i,0} + \eta_i^*$  makes this maximal principle a direct corollary of Lemma 1.

Next, we prove the Hamiltonian condition for the adversary, *i.e.*

$$\sum_{i=1}^N H_0(x_{i,0}^* + \eta_i^*, p_{i,1}^*, \theta_0^*) \leq \sum_{i=1}^N H_0(x_{i,0}^* + \eta_i, p_{i,1}^*, \theta_0^*), \forall \|\eta_i\|_\infty \leq \epsilon \quad (16)$$

Assuming  $R_{i,t} = 0$  like above, we define a new optimal control problem with target function  $\tilde{\ell}_i() = -\ell_i()$  and previous dynamics except  $x_{i,1} = \tilde{f}_0(x_{i,0}; \theta_0, \eta_i) = f_0(x_{i,0} + \eta_i; \theta_0)$ :

$$\min_{\|\eta\|_\infty \leq \epsilon} \tilde{J}(\theta, \eta) := \frac{1}{N} \sum_{i=1}^N \tilde{\ell}_i(x_{i,T}) \quad (17)$$

$$\text{subject to } x_{i,1} = \tilde{f}_0(x_{i,0}; \theta_0, \eta_i), i = 1, 2, \dots, N \quad (18)$$

$$x_{i,t+1} = f_t(x_{i,t}, \theta_t), t = 1, 2, \dots, T-1. \quad (19)$$

However in this time, all the layer parameters  $\theta_t$  are **fixed** and  $\eta_i$  is the control. From the above Lemma 1 we get

$$\tilde{x}_{i,1}^* = \nabla_p \tilde{H}_0(\tilde{x}_{i,0}^*, \tilde{p}_{i,1}^*, \theta_0, \eta_i^*), \quad \tilde{x}_{i,t+1}^* = \nabla_p H_t(\tilde{x}_{i,t}^*, \tilde{p}_{i,t+1}^*, \theta_t), \quad \tilde{x}_{i,0}^* = x_{i,0}, \quad (20)$$

$$\tilde{p}_{i,0}^* = \nabla_x \tilde{H}_0(\tilde{x}_{i,0}^*, \tilde{p}_{i,1}^*, \theta_0, \eta_i^*), \quad \tilde{p}_{i,t}^* = \nabla_x H_t(\tilde{x}_{i,t}^*, \tilde{p}_{i,t+1}^*, \theta_t), \quad \tilde{p}_{i,T}^* = \frac{1}{N} \nabla \ell_i(\tilde{x}_{i,T}^*), \quad (21)$$

where  $\tilde{H}_0(x, p, \theta_0, \eta) = p \cdot \tilde{f}_0(x; \theta_0, \eta) = p \cdot f_0(x + \eta; \theta_0)$  and  $t = 1, \dots, T-1$ . This gives the fact that  $\tilde{x}_{i,t}^* = x_{i,t}^*$ . Lemma 1 also tells us

$$\sum_{i=1}^N \tilde{H}_0(\tilde{x}_{i,0}^*, \tilde{p}_{i,t+1}^*, \theta_0, \eta_i^*) \geq \sum_{i=1}^N \tilde{H}_0(\tilde{x}_{i,0}^*, \tilde{p}_{i,1}^*, \theta_0, \eta_i), \forall \|\eta_i\|_\infty \leq \epsilon \quad (22)$$

which is

$$\sum_{i=1}^N \tilde{p}_{i,1}^* \cdot f_0(\tilde{x}_{i,0}^* + \eta_i^*; \theta_0) \geq \sum_{i=1}^N \tilde{p}_{i,1}^* \cdot f_0(\tilde{x}_{i,0}^* + \eta_i; \theta_0), \forall \|\eta_i\|_\infty \leq \epsilon \quad (23)$$

On the other hand, Lemma 1 gives

$$\tilde{p}_t^* = -\nabla_{x_t}(\tilde{\ell}(x_T)) = \nabla_{x_t}(\ell(x_T)) = -p_t^*.$$

Then we have

$$\sum_{i=1}^N p_{i,1}^* \cdot f_0(x_{i,0}^* + \eta_i^*; \theta_0) \leq \sum_{i=1}^N p_{i,1}^* \cdot f_0(x_{i,0}^* + \eta_i; \theta_0), \forall \|\eta_i\|_\infty \leq \epsilon \quad (24)$$

which is

$$\sum_{i=1}^N H_0(x_{i,0}^*, p_{i,t+1}^*, \theta_0, \eta_i^*) \leq \sum_{i=1}^N H_0(x_{i,0}^*, p_{i,1}^*, \theta_0, \eta_i), \forall \|\eta_i\|_\infty \leq \epsilon \quad (25)$$

This finishes the proof for the adversarial control. □

**Remark.** The additional assumption that the sets  $\{f_t(x, \theta) : \theta \in \Theta_t\}$  and  $\{R_t(x, \theta) : \theta \in \Theta_t\}$  are convex for every  $t$  and  $x \in \mathbb{R}^{d_t}$  is extremely weak and is not unrealistic which is already explained in [19].

## B Experiment Setup and Supplementary Experiments

### B.1 MNIST

Training against PGD-40 is a common practice to get sota results on MNIST. We adopt network architectures from [42] with four convolutional layers followed by three fully connected layers. Following [42] and [23], we set the size of perturbation as  $\epsilon = 0.3$  in an infinite norm sense. Experiments are taken on idle NVIDIA Tesla P100 GPUs. We train models for 55 epochs with a batch size of 256, longer than what convergence needs for both training methods. The learning rate is set to 0.1 initially, and is lowered by 10 times at epoch 45. We use a weight decay of  $5e-4$  and a momentum of 0.9. To measure the robustness of trained models, we performed a PGD-40 and CW[?] attack with CW coefficient  $c = 5e2$  and  $lr = 1e-2$ .

| Training Methods | Clean Data | PGD-40 Attack | CW Attack |
|------------------|------------|---------------|-----------|
| PGD-5 [23]       | 99.43%     | 42.39%        | 77.04%    |
| PGD-10 [23]      | 99.53%     | 77.00%        | 82.00%    |
| PGD-40 [23]      | 99.49%     | 96.56%        | 93.52%    |
| YOPO-5-10 (Ours) | 99.46%     | 96.27%        | 93.56%    |

Table 1: Results of MNIST robust training. YOPO-5-10 achieves state-of-the-art result as PGD-40. Notice that for every epoch, PGD-5 and YOPO-5-3 have approximately the same computational cost.

### B.2 CIFAR-10

Following [23], we take Preact-ResNet18 and Wide ResNet-34 as the models for testing. We set the size of perturbation as  $\epsilon = 8/255$  in an infinite norm sense. We perform a 20 steps of PGD with step size  $2/255$  when testing. For PGD adversarial training, we train models for 105 epochs as a common practice. The learning rate is set to  $5e-2$  initially, and is lowered by 10 times at epoch 79, 90 and 100. For YOPO- $m-n$ , we train models for 40 epochs which is much longer than what convergence needs. The learning rate is set to  $0.2/m$  initially, and is lowered by 10 times at epoch 30 and 36. We use a batch size of 256, a weight decay of  $5e-4$  and a momentum of 0.9 for both algorithm. We also test our model’s robustness under CW attack [?] with  $c = 5e2$  and  $lr = 1e-2$ . The experiments are taken on idle NVIDIA GeForce GTX 1080 Ti GPUs.

| Training Methods | Clean Data | PGD-20 Attack | CW Attack |
|------------------|------------|---------------|-----------|
| PGD-3 [23]       | 88.19%     | 32.51%        | 54.65%    |
| PGD-5 [23]       | 86.63%     | 37.78%        | 57.71%    |
| PGD-10 [23]      | 84.82%     | 41.61%        | 58.88%    |
| YOPO-3-5 (Ours)  | 82.14%     | 38.18%        | 55.73%    |
| YOPO-5-3 (Ours)  | 83.99%     | 44.72%        | 59.77%    |

Table 2: Results of PreAct-Res18 for CIFAR10. Note that for every epoch, PGD-3 and YOPO-3-5 have the approximately same computational cost, and so do PGD-5 and YOPO-5-3.

### B.3 TRADES

TRADES[42] achieves the state-of-the-art results in adversarial defending. The methodology achieves the 1st place out of the 1,995 submissions in the robust model track of NeurIPS 2018 Adversarial Vision Challenge. TRADES proposed a surrogate loss which quantify the trade-off in terms of the gap between the risk for adversarial examples and the risk for non-adversarial examples and the objective function can be formulated as

$$\min_{\theta} \mathbb{E}_{(x,y) \sim \mathcal{D}} \max_{\|\eta\| \leq \epsilon} (\ell(f_{\theta}(x), y) + \mathcal{L}(f_{\theta}(x), f_{\theta}(x + \eta)) / \lambda) \quad (26)$$

where  $f_{\theta}(x)$  is the neural network parameterized by  $\theta$ ,  $\ell$  denotes the loss function,  $\mathcal{L}(\cdot, \cdot)$  denotes the consistency loss and  $\lambda$  is a balancing hyper parameter which we set to be 1 as in [42]. To solve the min-max problem, [42] also searched the ascent direction via the gradient of the "adversarial loss", *i.e.* generating the adversarial example before performing gradient descent on the weight. Specifically,

the PGD attack is performed to maximize a consistency loss instead of classification loss. For each clean data  $x$ , a single iteration of the adversarial attack can be formulated as

$$x' \leftarrow \Pi_{\|x'-x\| \leq \epsilon} (\alpha_1 \text{sign}(\nabla_{x'} \mathcal{L}(f_\theta(x), f_\theta(x'))) + x'),$$

where  $\Pi$  is projection operator. In the implementation of [42], after 10 such update iterations for each input data  $x_i$ , the update for weights is performed as

$$\theta \leftarrow \theta - \alpha_2 \sum_{i=1}^B \nabla_\theta [\ell(f_\theta(x_i), y_i) + \mathcal{L}(f_\theta(x_i), f_\theta(x'_i))] / B,$$

where  $B$  is the batch size. We name this algorithm as TRADES-10, for it uses 10 iterations to update the adversary.

Following the notation used in previous section, we denote  $f_0$  as the first layer of the neural network and  $g_{\bar{\theta}}$  denotes the network without the first layer. The whole network can be formulated as the composition of the two parts, i.e.  $f_\theta = g_{\bar{\theta}} \circ f_0$ . To apply our gradient based YOPO method to TRADES, following Section 2, we decouple the adversarial calculation and network updating as shown in Algorithm 1. Projection operation is omitted. Notice that in Section.2 we take advantage every intermediate perturbation  $\eta^j, j = 1, \dots, m-1$  to update network weights while here we only use the final perturbation  $\eta = \eta^m$  to compute the final loss term. In practice, this accumulation of gradient doesn't helps. For TRADES-YOPO, acceleration of YOPO is brought by decoupling the adversarial calculation with the gradient back propagation.

---

**Algorithm 1** TRADES-YOPO- $m$ - $n$

---

Randomly initialize the network parameters or using a pre-trained network.

**repeat**

Randomly select a mini-batch  $\mathcal{B} = \{(x_1, y_1), \dots, (x_B, y_B)\}$  from training set.

Initialize  $\eta_i^{1,0}, i = 1, 2, \dots, B$  by sampling from a uniform distribution between  $[-\epsilon, \epsilon]$

**for**  $j = 1$  to  $m$  **do**

$$p_i = \nabla_{g_{\bar{\theta}}} \left( \mathcal{L} \left( g_{\bar{\theta}} \left( f_0 \left( x_i + \eta_i^{j,0} \right), \theta_0 \right) \right), g_{\bar{\theta}} \left( f_0 \left( x_i, \theta_0 \right) \right) \right) \cdot \nabla_{f_0} \left( g_{\bar{\theta}} \left( f_0 \left( x_i + \eta_i^{j,0} \right), \theta_0 \right) \right),$$

$$i = 1, 2, \dots, B$$

**for**  $s = 0$  to  $n-1$  **do**

$$\eta_i^{j,s+1} \leftarrow \eta_i^{j,s} + \alpha_1 \cdot p_i \cdot \nabla_{\eta} f_0(x_i + \eta_i^{j,s}, \theta_0), i = 1, 2, \dots, B$$

**end for**

$$\eta_i^{j+1,0} = \eta_i^{j,n}, i = 1, 2, \dots, B$$

**end for**

$$\theta \leftarrow \theta - \alpha_2 \sum_{i=1}^B \nabla_\theta [\ell(f_\theta(x_i), y_i) + \mathcal{L}(f_\theta(x_i), f_\theta(x_i + \eta_i^{m,n}))] / B.$$

**until** Convergence

---

We name this algorithm as TRADES-YOPO- $m$ - $n$ . With less than half time of TRADES-10, TRADES-YOPO-3-4 achieves even better result than its baseline. Quantitative results is demonstrated in Table 3. The mini-batch size is 256. All the experiments run for 105 epochs and the learning rate set to  $2e-1$  initially, and is lowered by 10 times at epoch 70, 90 and 100. The weight decay coefficient is  $5e-4$  and momentum coefficient is 0.9. We also test our model's robustness under CW attack [?] with  $c = 5e2$  and  $lr = 5e-4$ . Experiments are taken on idle NVIDIA Tesla P100 GPUs.

| Training Methods       | Clean Data | PGD-20 Attack | CW Attack | Training Time (mins) |
|------------------------|------------|---------------|-----------|----------------------|
| TRADES-10[42]          | 86.14%     | 44.50%        | 58.40%    | 633                  |
| TRADES-YOPO-3-4 (Ours) | 87.82%     | 46.13%        | 59.48%    | 259                  |
| TRADES-YOPO-2-5 (Ours) | 88.15%     | 42.48%        | 59.25%    | 218                  |

Table 3: Results of "TRADES" training with PreAct-Res18 for CIFAR10

## References

- [1] Armin Askari, Geoffrey Negiar, Rajiv Sambharya, and Laurent El Ghaoui. Lifted neural networks. *arXiv preprint arXiv:1805.01532*, 2018.

- [2] Anish Athalye, Nicholas Carlini, and David Wagner. Obfuscated gradients give a false sense of security: Circumventing defenses to adversarial examples. *arXiv preprint arXiv:1802.00420*, 2018.
- [3] Vladimir Grigor’evich Boltyanskii, Revaz Valer’yanovich Gamkrelidze, and Lev Semenovitch Pontryagin. The theory of optimal processes. i. the maximum principle. Technical report, TRW SPACE TECHNOLOGY LABS LOS ANGELES CALIF, 1960.
- [4] Tian Qi Chen, Yulia Rubanova, Jesse Bettencourt, and David K Duvenaud. Neural ordinary differential equations. In *Advances in Neural Information Processing Systems*, pages 6572–6583, 2018.
- [5] Moustapha Cisse, Piotr Bojanowski, Edouard Grave, Yann Dauphin, and Nicolas Usunier. Parseval networks: Improving robustness to adversarial examples. In *Proceedings of the 34th International Conference on Machine Learning-Volume 70*, pages 854–863. JMLR. org, 2017.
- [6] Lawrence C Evans. An introduction to mathematical optimal control theory. *Lecture Notes, University of California, Department of Mathematics, Berkeley*, 2005.
- [7] Ian Goodfellow, Yoshua Bengio, and Aaron Courville. *Deep learning*. MIT press, 2016.
- [8] Fangda Gu, Armin Askari, and Laurent El Ghaoui. Fenchel lifted networks: A lagrange relaxation of neural network training. *arXiv preprint arXiv:1811.08039*, 2018.
- [9] Eldad Haber and Lars Ruthotto. Stable architectures for deep neural networks. *Inverse Problems*, 34(1):014004, 2017.
- [10] Zhouyuan Huo, Bin Gu, Qian Yang, and Heng Huang. Decoupled parallel backpropagation with convergence guarantee. *arXiv preprint arXiv:1804.10574*, 2018.
- [11] Andrew Ilyas, Ajil Jalal, Eirini Asteri, Constantinos Daskalakis, and Alexandros G Dimakis. The robust manifold defense: Adversarial training using generative models. *arXiv preprint arXiv:1712.09196*, 2017.
- [12] Max Jaderberg, Wojciech Marian Czarnecki, Simon Osindero, Oriol Vinyals, Alex Graves, David Silver, and Koray Kavukcuoglu. Decoupled neural interfaces using synthetic gradients. In *Proceedings of the 34th International Conference on Machine Learning-Volume 70*, pages 1627–1635. JMLR. org, 2017.
- [13] Daniel Jakubovitz and Raja Giryes. Improving dnn robustness to adversarial attacks using jacobian regularization. In *Proceedings of the European Conference on Computer Vision (ECCV)*, pages 514–529, 2018.
- [14] Alexey Kurakin, Ian Goodfellow, and Samy Bengio. Adversarial machine learning at scale. *arXiv preprint arXiv:1611.01236*, 2016.
- [15] Yann LeCun, Yoshua Bengio, and Geoffrey Hinton. Deep learning. *nature*, 521(7553):436, 2015.
- [16] Yann LeCun, D Touresky, G Hinton, and T Sejnowski. A theoretical framework for back-propagation. In *Proceedings of the 1988 connectionist models summer school*, volume 1, pages 21–28. CMU, Pittsburgh, Pa: Morgan Kaufmann, 1988.
- [17] Jia Li, Cong Fang, and Zhouchen Lin. Lifted proximal operator machines. *arXiv preprint arXiv:1811.01501*, 2018.
- [18] Qianxiao Li, Long Chen, Cheng Tai, and E Weinan. Maximum principle based algorithms for deep learning. *The Journal of Machine Learning Research*, 18(1):5998–6026, 2017.
- [19] Qianxiao Li and Shuji Hao. An optimal control approach to deep learning and applications to discrete-weight neural networks. In Jennifer Dy and Andreas Krause, editors, *Proceedings of the 35th International Conference on Machine Learning*, volume 80 of *Proceedings of Machine Learning Research*, pages 2985–2994, Stockholmsmässan, Stockholm Sweden, 10–15 Jul 2018. PMLR.

- [20] Ji Lin, Chuang Gan, and Song Han. Defensive quantization: When efficiency meets robustness. In *International Conference on Learning Representations*, 2019.
- [21] Yiping Lu, Aoxiao Zhong, Quanzheng Li, and Bin Dong. Beyond finite layer neural networks: Bridging deep architectures and numerical differential equations. *arXiv preprint arXiv:1710.10121*, 2017.
- [22] Tiange Luo, Tianle Cai, Mengxiao Zhang, Siyu Chen, and Liwei Wang. RANDOM MASK: Towards robust convolutional neural networks, 2019.
- [23] Aleksander Madry, Aleksandar Makelov, Ludwig Schmidt, Dimitris Tsipras, and Adrian Vladu. Towards deep learning models resistant to adversarial attacks. In *International Conference on Learning Representations*, 2018.
- [24] Seyed-Mohsen Moosavi-Dezfooli, Alhussein Fawzi, and Pascal Frossard. Deepfool: a simple and accurate method to fool deep neural networks. In *Proceedings of the IEEE Conference on Computer Vision and Pattern Recognition*, pages 2574–2582, 2016.
- [25] Lev Semenovich Pontryagin. *Mathematical theory of optimal processes*. CRC, 1987.
- [26] Haifeng Qian and Mark N Wegman. L2-nonexpansive neural networks. *arXiv preprint arXiv:1802.07896*, 2018.
- [27] Ali Shafahi, Mahyar Najibi, Amin Ghiasi, Xu Zeng, John Dickerson, Christoph Studer, Larry S. Davis, Gavin Taylor, and Tom Goldstein. Adversarial training for free! *arXiv preprint arXiv:1904.12843*, 2019.
- [28] Yang Song, Taesup Kim, Sebastian Nowozin, Stefano Ermon, and Nate Kushman. Pixeldefend: Leveraging generative models to understand and defend against adversarial examples. *arXiv preprint arXiv:1710.10766*, 2017.
- [29] Sho Sonoda and Noboru Murata. Transport analysis of infinitely deep neural network. *The Journal of Machine Learning Research*, 20(1):31–82, 2019.
- [30] Ke Sun, Zhanxing Zhu, and Zhouchen Lin. Enhancing the robustness of deep neural networks by boundary conditional gan. *arXiv preprint arXiv:1902.11029*, 2019.
- [31] Jan Svoboda, Jonathan Masci, Federico Monti, Michael Bronstein, and Leonidas Guibas. Peernets: Exploiting peer wisdom against adversarial attacks. In *International Conference on Learning Representations*, 2019.
- [32] Christian Szegedy, Wojciech Zaremba, Ilya Sutskever, Joan Bruna, Dumitru Erhan, Ian Goodfellow, and Rob Fergus. Intriguing properties of neural networks. *arXiv preprint arXiv:1312.6199*, 2013.
- [33] Gavin Taylor, Ryan Burmeister, Zheng Xu, Bharat Singh, Ankit Patel, and Tom Goldstein. Training neural networks without gradients: A scalable admm approach. In *International conference on machine learning*, pages 2722–2731, 2016.
- [34] Matthew Thorpe and Yves van Gennip. Deep limits of residual neural networks. *arXiv preprint arXiv:1810.11741*, 2018.
- [35] Abraham Wald. Contributions to the theory of statistical estimation and testing hypotheses. *The Annals of Mathematical Statistics*, 10(4):299–326, 1939.
- [36] Bao Wang, Binjie Yuan, Zuoqiang Shi, and Stanley J Osher. Enresnet: Resnet ensemble via the feynman-kac formalism. *arXiv preprint arXiv:1811.10745*, 2018.
- [37] E Weinan. A proposal on machine learning via dynamical systems. *Communications in Mathematics and Statistics*, 5(1):1–11, 2017.
- [38] E Weinan, Jiequn Han, and Qianxiao Li. A mean-field optimal control formulation of deep learning. *Research in the Mathematical Sciences*, 6(1):10, 2019.

- [39] Cihang Xie, Yuxin Wu, Laurens van der Maaten, Alan Yuille, and Kaiming He. Feature denoising for improving adversarial robustness. *arXiv preprint arXiv:1812.03411*, 2018.
- [40] Weilin Xu, David Evans, and Yanjun Qi. Feature squeezing: Detecting adversarial examples in deep neural networks. *arXiv preprint arXiv:1704.01155*, 2017.
- [41] Nanyang Ye and Zhanxing Zhu. Bayesian adversarial learning. In *Advances in Neural Information Processing Systems*, pages 6892–6901, 2018.
- [42] Hongyang Zhang, Yaodong Yu, Jiantao Jiao, Eric P Xing, Laurent El Ghaoui, and Michael I Jordan. Theoretically principled trade-off between robustness and accuracy. *arXiv preprint arXiv:1901.08573*, 2019.
- [43] Jingfeng Zhang, Bo Han, Laura Wynter, Kian Hsiang Low, and Mohan Kankanhalli. Towards robust resnet: A small step but a giant leap. *arXiv preprint arXiv:1902.10887*, 2019.
- [44] Xiaoshuai Zhang, Yiping Lu, Jiaying Liu, and Bin Dong. Dynamically unfolding recurrent restorer: A moving endpoint control method for image restoration. In *International Conference on Learning Representations*, 2019.
- [45] Daniel Zügner, Amir Akbarnejad, and Stephan Günnemann. Adversarial attacks on neural networks for graph data. In *Proceedings of the 24th ACM SIGKDD International Conference on Knowledge Discovery & Data Mining*, pages 2847–2856. ACM, 2018.
