# Supplementary material
Source: ML conference proceedings conference paper supplement (https://proceedings.neurips.cc/paper_files/paper/2019/hash/812b4ba287f5ee0bc9d43bbf5bbe87fb-Abstract.html)

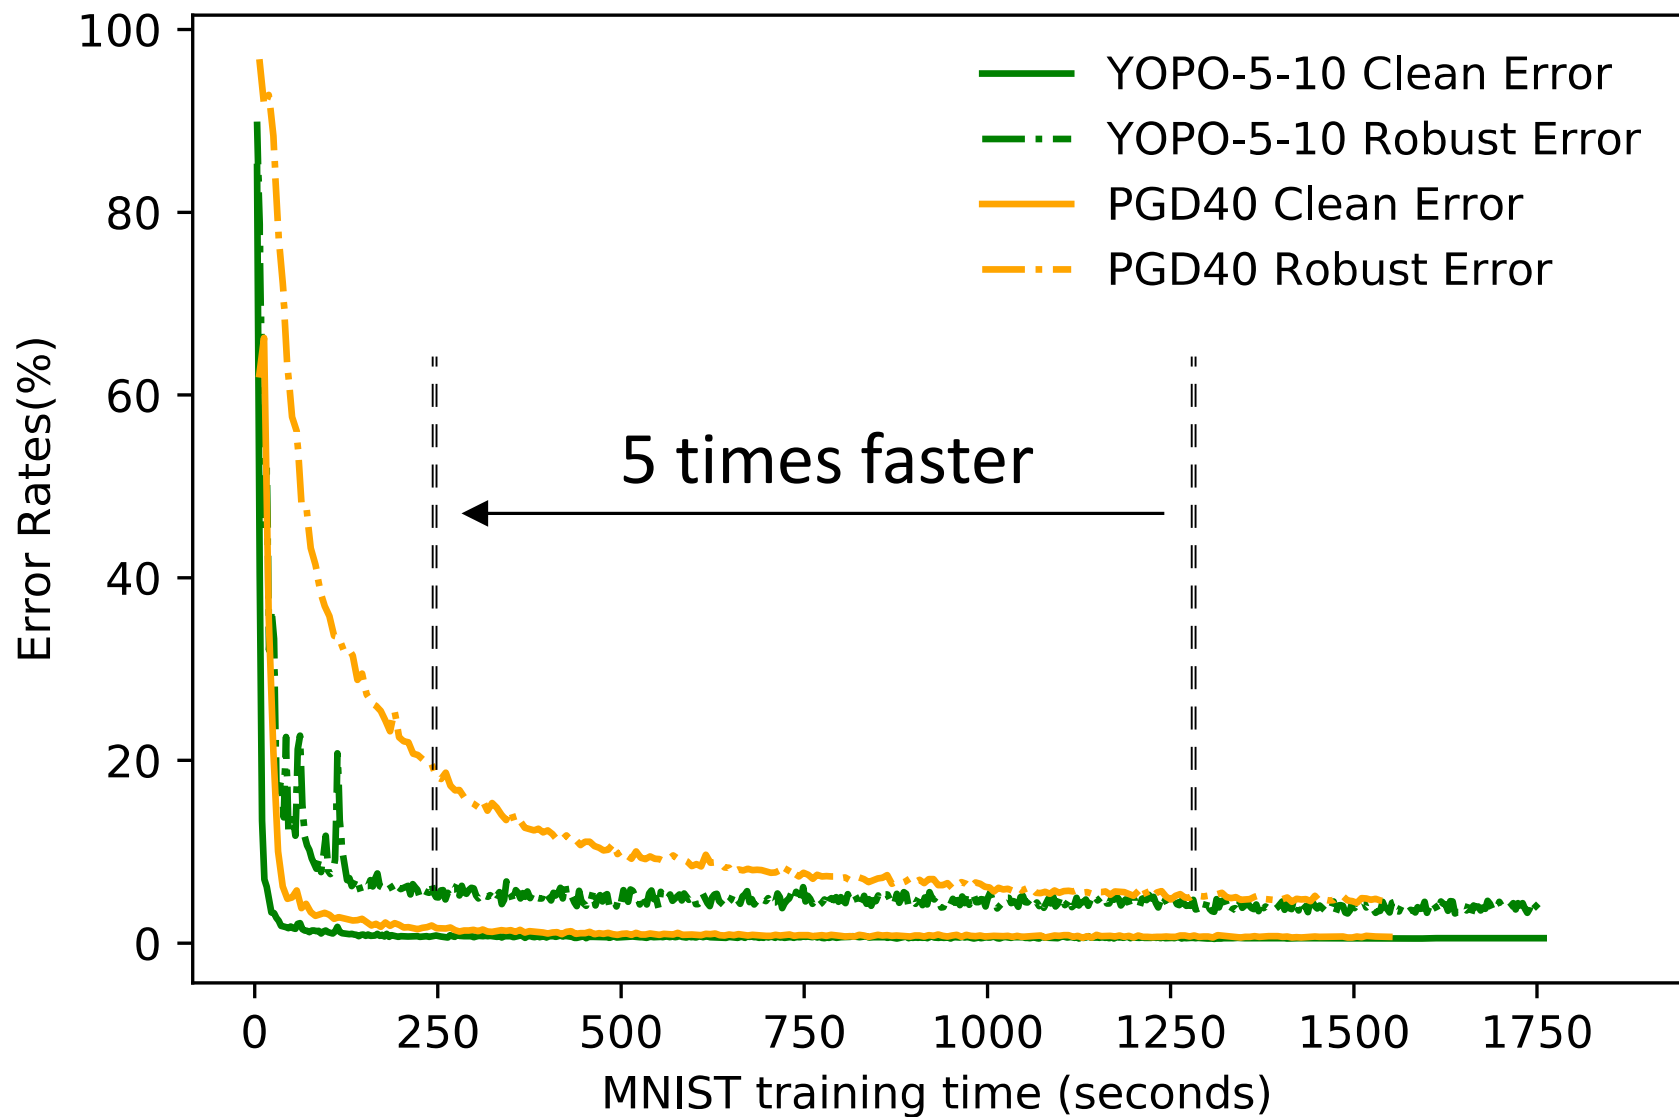

Supplement: Supplementary file [file 812b4ba287f5ee0bc9d43bbf5bbe87fb-Supplemental.zip]
